# Supplementary material for: Identification and functional analysis of PIN family genes in Gossypium barbadense
Source: PeerJ. 2022 Oct 18;10:e14236. doi: 10.7717/peerj.14236 (PMC9586078; doi:10.7717/peerj.14236)
Supplement: Supplemental Information 2 [file peerj-10-14236-s002.xlsx]

## Sheet: Sheet1
The name of the primer	F	R	Enzyme loci	role
Gb_PIN1	CGCCCTTCCAATCTGACCAA	CCGAAATTGGAGTTGCGTCC	no	qRT-PCR
Gb_PIN2	TCCAAGGTGAGCAAAAGGGG	AGCTTCCTGAAAACTCCCCG	no	qRT-PCR
Gb_PIN3	ATGGCCATGTTCAGTCTCGG	TGGACAATGGCAACCCGTAA	no	qRT-PCR
Gb_PIN4	ATGGCCATGTTCAGTCTCGG	TGGACAATGGCAACCCGTAA	no	qRT-PCR
Gb_PIN5	CAACACCGAGAGGTTCGAGT	GGTCCACGTGAAGCAGACAT	no	qRT-PCR
Gb_PIN6	CGGCTCCTAATCCGGGTATG	AGGGGAGACAGCTAACCGAA	no	qRT-PCR
Gb_PIN7	CGCCGTTGTACCTCTCTACG	GGGACGGCAAATAAAGCGAC	no	qRT-PCR
Gb_PIN8	CCGCCGTTGTACCTCTCTAC	AGGGACGGCAAATAAAGCGA	no	qRT-PCR
PIN7_Vigs	GCTCTAGAAAGAACCTTTACAAACCG	GGGGTACCCCATTTGATCTTATACC	XbaI,KpnI	Construction of VIGS vector
