# Supplementary material for: Identification and functional analysis of PIN family genes in Gossypium barbadense
Source: PeerJ. 2022 Oct 18;10:e14236. doi: 10.7717/peerj.14236 (PMC9586078; doi:10.7717/peerj.14236)
Supplement: Supplemental Information 3 [file peerj-10-14236-s003.xlsx]

## Sheet: Sheet1
qRT-PCR during fiber development
Sample Name	UBQ(Internal genes)	GbPIN1	GbPIN2	GbPIN3	GbPIN4	GbPIN5	GbPIN6	GbPIN7	GbPIN8
PimaS-7-5DPA	28.7696	32.2758	33.7501	31.1297	33.4203	35.5025	33.6676	34.943	35.9357
PimaS-7-5DPA	28.7346	32.2521	33.9068	31.1771	33.6331	34.9818	33.9103	35.0563	35.8718
PimaS-7-5DPA	28.8046	32.2284	34.07	31.2245	33.8459	35.158	33.7889	34.9996	35.8079
PimaS-7-10DPA	27.2207	34.7983	31.8285	30.9398	33.4744	34.8441	33.2387	34.9669	35.4078
PimaS-7-10DPA	27.5098	34.9485	32.5908	30.9876	33.3676	34.6675	33.0414	35.1171	35.3103
PimaS-7-10DPA	27.6235	34.648	32.2096	30.5038	33.6371	35.0206	33.1401	35.2674	35.2128
PimaS-7-15DPA	26.9281	33.0042	34.4482	29.0618	31.8366	33.8349	33.2489	34.8425	34.094
PimaS-7-15DPA	26.8606	32.8806	34.844	29.6939	31.8101	33.8372	33.0001	34.8007	33.9401
PimaS-7-15DPA	26.8324	33.1278	34.6461	29.3779	31.8631	33.8326	33.4977	34.8842	34.2479
PimaS-7-20DPA	26.6888	32.9804	33.58	28.8899	32.1886	34.8925	33.559	33.6361	32.9002
PimaS-7-20DPA	26.3881	32.5377	33.4187	28.7176	32.3539	34.9274	33.5145	33.9528	32.897
PimaS-7-20DPA	26.2747	32.7591	33.7413	28.8037	32.0232	34.8748	33.6034	33.3193	32.8938
PimaS-7-25DPA	29.9546	32.17	35.2716	29.6732	33.7188	35.2154	33.9501	34.3863	35.5235
PimaS-7-25DPA	29.9998	32.4916	34.9313	29.4154	33.8008	35.2812	33.8105	34.3347	35.2205
PimaS-7-25DPA	30.235	32.3308	35.1015	29.9309	33.8828	35.1495	33.6709	34.283	35.372
PimaS-7-30DPA	27.3183	33.0003	30.1634	30.3185	30.6186	34.2587	31.0509	34.9549	35.2205
PimaS-7-30DPA	26.9843	33.5181	30.3218	30.2926	30.8164	34.4266	31.2967	34.6847	35.372
PimaS-7-30DPA	26.9704	33.0785	30.605	30.3443	30.7175	34.0909	31.5426	34.4145	35.5235
5917-5DPA	26.984	30.6229	28.4093	33.7606	32.7881	29.8424	31.1407	28.8347	32.9713
5917-5DPA	26.5158	30.1945	28.6265	33.9471	32.5662	29.637	31.2518	29.0881	32.8421
5917-5DPA	26.4362	30.123	28.1922	33.5741	32.3443	29.7397	31.3629	29.3414	32.7128
5917-10DPA	24.3101	29.4069	25.1788	33.9369	32.7413	29.6111	28.9123	30.1461	31.0142
5917-10DPA	24.3565	29.7916	25.3281	34.1405	32.4017	29.956	28.9924	30.2098	31.9375
5917-10DPA	24.4029	29.5993	25.4774	34.0387	32.5715	29.7835	28.9524	30.2735	31.0168
5917-15DPA	28.5366	30.7433	27.4333	33.9617	33.519	29.7957	31.4076	28.7114	33.6709
5917-15DPA	28.8622	30.5072	27.2674	34.0792	33.2219	29.5057	31.7944	28.9162	33.3442
5917-15DPA	28.8985	30.6253	27.1016	34.1967	33.3704	29.6507	31.601	29.1211	33.6755
5917-20DPA	30.3252	30.423	30.3914	35.2848	36.659	30.9514	32.7844	29.7209	34.8105
5917-20DPA	30.0217	30.4066	30.7462	35.3618	36.9355	31.1285	32.8129	29.8551	34.887
5917-20DPA	29.9486	30.4394	30.0367	35.4388	36.7972	31.0399	32.7986	29.9892	34.7341
5917-25DPA	27.9558	30.3441	31.0996	32.5914	33.2754	30.8259	31.6319	29.895	35.6783
5917-25DPA	28.2881	30.6522	30.9507	32.7786	33.44	30.6892	31.439	30.0998	35.4407
5917-25DPA	28.3933	30.036	31.0252	32.9658	33.6046	30.9626	31.8248	30.277	35.9158
5917-30DPA	25.4447	29.4048	27.2933	34.6616	34.419	30.1639	29.33	29.8473	33.6864
5917-30DPA	25.5742	29.5084	27.5716	34.8865	34.2546	30.2676	29.5521	30.0123	33.8396
5917-30DPA	25.7293	29.6119	27.015	34.4368	34.0902	30.3712	29.4411	30.1774	33.5332
VIGS silent efficiency verification
	CK		Treatment group
	UBQ（Internal genes）	Gb_PIN7	UBQ（Internal genes）	Gb_PIN7
5917-Leaf	19.3371	26.4538	18.9284	26.8867
5917-Leaf	19.3511	26.7316	19.0355	27.4289
5917-Leaf	19.323	26.1759	19.2997	27.4737
PimaS-7-Leaf	18.6134	23.1298	19.4027	26.1375
PimaS-7-Leaf	18.79	23.1976	18.37	26.0801
PimaS-7-Leaf	18.3363	22.7292	18.0972	25.864
