# Supplementary material for: Identification and functional analysis of PIN family genes in Gossypium barbadense
Source: PeerJ. 2022 Oct 18;10:e14236. doi: 10.7717/peerj.14236 (PMC9586078; doi:10.7717/peerj.14236)
Supplement: Supplemental Information 4 [file peerj-10-14236-s004.xlsx]

## Sheet: Sheet1
		PimaS-7_0DPA	PimaS-7_5DPA	PimaS-7_10DPA	PimaS-7_15DPA	PimaS-7_20DPA	PimaS-7_25DPA	PimaS-7_30DPA	PimaS-7_35DPA
1	Gb_PIN1	2.50717	1.58505	0.398568	3.61225	2.74316	0.339118	0.184117	0.263758
2	Gb_PIN2	3.12244	1.43633	0.674029	4.15306	4.16065	0.687997	0.306323	0.625223
3	Gb_PIN3	1.87647	0.657948	0.213599	0.0201027	0	0.104852	0.0794683	0.035013
4	Gb_PIN4	3.78155	1.1093	0.389791	0.599177	0.735977	0.0447393	0.0984073	0.22649
5	Gb_PIN5	1.16346	0.575663	0.352963	0.397362	0.40342	1.92816	2.75364	4.00672
6	Gb_PIN6	1.5911	0.942242	0.498365	0.477301	0.575285	2.43112	2.68357	4.55661
7	Gb_PIN7	4.88724	3.13391	3.51961	22.7573	24.1083	0.965111	0.677362	1.03194
8	Gb_PIN8	4.99508	2.88237	1.26636	2.632	2.7173	0.948019	1.2421	1.35462
9	Gb_PIN9	0.021187	0	0	0	0	0	0	0
10	Gb_PIN10	0.052862	0.0730027	0	0	0.007739	0	0	0
11	Gb_PIN11	1.30238	1.88122	5.08508	4.699	5.5034	1.38964	1.67931	1.50342
12	Gb_PIN12	3.79841	3.83756	8.68349	6.84444	4.33012	2.4201	1.75977	2.09871
13	Gb_PIN13	0	0	0	0	0	0	0	0
14	Gb_PIN14	4.18584	1.93707	0.469448	0.0641223	0.125991	0.392211	0.370597	0.493264
15	Gb_PIN15	0	0	0	0	0	0	0	0
16	Gb_PIN16	0	0	0	0	0	0	0	0
17	Gb_PIN17	0.353724	0.321143	0.101454	0.0248793	0.057952	0.345253	0.537165	0.712355
18	Gb_PIN18	0.559549	0.461292	0.238412	0.099468	0.11386	1.63672	3.08371	3.06228
19	Gb_PIN19	21.0901	9.00582	1.56766	0.948865	0.36139	0.215031	0.0522363	0.0178193
20	Gb_PIN20	1.08683	0.510584	0.020576	0	0.027507	0	0	0
21	Gb_PIN21	0	0	0	0	0	0	0	0
22	Gb_PIN22	0	0.0143537	0	0	0	0	0	0
23	Gb_PILS1	0.166565	0.056952	0.0581557	0	0.00841367	0.027682	0.00859233	0
24	Gb_PILS2	0	3.28141	16.8307	13.9273	15.1246	0.142527	0.00899433	0.0369877
25	Gb_PILS3	0	0.0142233	0.0211253	0.120318	0	0.792778	1.82959	4.24561
26	Gb_PILS4	4.09107	1.40218	0.098779	0	0.0258557	0.0500413	0.0355477	0.516076
27	Gb_PILS5	0	0	0.0150097	0	0	0.156144	0.159691	0.234384
28	Gb_PILS6	6.40249	1.70369	0.289974	0.0983067	0.095176	0.020345	0.0242303	0.0832887
29	Gb_PILS7	0.256225	0.050259	0	0	0	0	0	0
30	Gb_PILS8	0.0509273	0.125659	1.48865	0	0	0	0	0
31	Gb_PILS9	0	0	0.135473	0	0	0	0	0
32	Gb_PILS10	0.0105183	0	0	0	0	0	0	0
33	Gb_PILS11	0	0	0	0	0	0	0	0
34	Gb_PILS12	0.486899	0	0	0	0	0	0	0.0109617
35	Gb_PILS13	0.0248123	0	0	0	0	0	0	0.0416057
36	Gb_PILS14	1.69995	0.101296	0.0257303	0	0.035154	0.063933	0.0298573	0.501239
37	Gb_PILS15	0.180657	0.673168	2.41553	2.10668	3.44016	0.404948	0.383153	0.176075
38	Gb_PILS16	0	0	0	0	0	0	0	0
39	Gb_PILS17	0.357701	0.0300983	0.0197837	0	0	0.0182383	0.0188743	0
40	Gb_PILS18	5.46145	4.51172	5.30863	4.94215	7.54338	4.56047	5.4838	6.77571
41	Gb_PILS19	6.66461	7.79551	9.99876	14.6033	14.7146	17.9454	21.5129	17.9701
42	Gb_PILS20	11.4618	4.96258	3.24081	3.19719	2.83537	5.22046	4.42143	4.71046
43	Gb_PILS21	5.8488	8.06934	10.6971	10.8141	9.32004	9.60821	8.45026	9.4325
44	Gb_PILS22	2.14343	2.62711	0.882102	3.07713	2.13469	10.2359	10.8531	10.8013
45	Gb_PILS23	3.34666	9.85567	7.64492	2.91617	2.21195	11.7326	14.2168	15.3274
		5917-0DPA	5917-5DPA	5917-10DPA	5917-15DPA	5917-20DPA	5917-25DPA	5917-30DPA	5917-35DPA
1	Gb_PIN1	2.57305	2.18673	0.740287	1.34329	1.69628	0.609526	0.520371	0.501605
2	Gb_PIN2	2.41702	2.62628	1.2405	2.88862	3.66997	1.75402	1.89068	4.65789
3	Gb_PIN3	1.71036	1.17123	0.448159	0.327428	0.114757	0.014563	0.0840987	0.0685577
4	Gb_PIN4	5.02285	1.87303	0.403359	1.84765	0.761323	0.312404	0.324087	0.331366
5	Gb_PIN5	0.530741	0.66107	0.792399	0.947936	1.69591	1.19196	2.72681	5.68274
6	Gb_PIN6	0.869972	1.50628	1.24701	1.25636	1.8288	1.10945	3.37352	5.6605
7	Gb_PIN7	2.31987	3.72611	3.52223	15.7207	13.7624	2.01668	1.22083	0.958511
8	Gb_PIN8	3.52912	3.99153	2.03722	2.20928	2.14897	0.664246	0.692751	1.02559
9	Gb_PIN9	0.0152443	0.040971	0	0.00825733	0	0	0.00687867	0.155741
10	Gb_PIN10	0.241303	0.137146	0.0219357	0.0243983	0	0	0	0
11	Gb_PIN11	1.26688	1.50639	4.89451	5.71427	4.62747	1.33474	1.90498	1.54325
12	Gb_PIN12	4.00441	4.39825	10.2066	7.11405	8.73557	2.64898	3.79874	2.62297
13	Gb_PIN13	0	0	0	0	0	0	0	0
14	Gb_PIN14	4.83463	3.89356	1.03275	0.338659	0.332811	0.181532	0.739525	0.732009
15	Gb_PIN15	0.00959367	0	0	0	0	0.0293447	0	0
16	Gb_PIN16	0	0	0.00785367	0	0	0	0.00550567	0
17	Gb_PIN17	0.112592	0.34569	0.366774	0.237525	0.33727	0.0134723	0.249996	0.462611
18	Gb_PIN18	0.204707	0.231503	0.106824	0.0352753	0.0871147	0	0.848739	0.486758
19	Gb_PIN19	16.0882	14.0312	4.54832	1.22683	1.5982	0.120761	0.683531	0.274965
20	Gb_PIN20	2.07833	1.55083	0.360584	0.0905343	0.0488093	0.0102627	0	0.034242
21	Gb_PIN21	0	0	0	0	0	0	0	0
22	Gb_PIN22	0	0.0328907	0.0126197	0	0	0	0	0
23	Gb_PILS1	0.270076	0.0746883	0.059217	0.0749987	0.0438843	0	0	0
24	Gb_PILS2	0.008152	2.63786	22.6866	27.5669	16.5633	1.3188	0.274393	0.455524
25	Gb_PILS3	0	0.010821	0.116182	0.089608	0.117636	0.0212897	0.601943	0.496885
26	Gb_PILS4	6.9512	2.03568	0.354019	0.0323457	0.0166927	0.269393	0.422867	0.562502
27	Gb_PILS5	0	0	0.010477	0	0.263203	0.033506	0.431776	0.277424
28	Gb_PILS6	8.00689	4.75838	0.723468	0.111362	0.0580867	0.732315	0.225138	0.402233
29	Gb_PILS7	0.185481	0.0949583	0.031464	0	0.0658563	0	0	0.00847533
30	Gb_PILS8	0	0	0.013933	0	0	0	0	0
31	Gb_PILS9	0	0	0	0	0	0	0	0
32	Gb_PILS10	0.00863433	0	0	0	0	0	0	0
33	Gb_PILS11	0	0	0	0	0	0	0	0
34	Gb_PILS12	0.382378	0.078714	0.045578	0	0	0	0	0
35	Gb_PILS13	0.00890767	0.0176147	0.00712733	0.00974833	0	0.018543	2.59539	0
36	Gb_PILS14	0.768863	0.0350457	0.079759	0	0	2.67016	10.5575	3.41945
37	Gb_PILS15	0.283538	0.581585	1.85786	13.6085	5.40203	1.80304	1.92549	0.490321
38	Gb_PILS16	0.0136047	0.0130933	0.0115937	0	0	0	0	0
39	Gb_PILS17	0.149966	0.0548183	0.0169103	0.019013	0	0	0	0
40	Gb_PILS18	4.5937	4.95992	6.57833	6.46638	6.27966	6.50637	4.83019	6.98903
41	Gb_PILS19	8.95261	8.23608	11.1064	12.9576	14.4603	24.9856	22.394	15.2702
42	Gb_PILS20	10.7374	4.85335	3.67044	2.71169	3.53201	4.13697	8.92434	10.9041
43	Gb_PILS21	5.04079	6.50914	9.45753	9.56425	11.5721	9.45001	9.9224	11.2393
44	Gb_PILS22	2.61265	3.63346	1.872	2.53224	5.12218	7.82045	10.3426	12.391
45	Gb_PILS23	4.04844	10.6459	8.03234	5.49575	8.44433	3.8578	10.7042	10.1451
		Hai7124_Root	Hai7124_Stem	Hai7124_Leaf	Hai7124_0DPA	Hai7124_1DPA	Hai7124_3DPA	Hai7124_5DPA	Hai7124_10DPA_Fiber	Hai7124_20DPA_Fiber	Hai7124_25DPA_Fiber
1	GB_PIN1	7.406	12.6157	2.26	23.3093	17.8918	7.9914	4.68067	0.796333	12.2206	5.3785
2	GB_PIN2	8.799	14.522	1.23867	49.88	32.8038	9.5552	2.15567	2.97833	22.8198	4.0535
3	GB_PIN3	12.4333	11.7433	1.19833	0.404333	0.484	0.7952	0.249667	0.149333	0.342667	1.973
4	GB_PIN4	10.785	10.6867	0.905667	1.40267	2.0366	3.0816	0.572	1.021	1.45118	3.3
5	GB_PIN5	10.8677	16.79	2.03133	1.085	0.7682	1.0822	0.254667	0.214667	0.601689	3.138
6	GB_PIN6	7.639	15.3507	2.74433	1.09533	0.631	1.003	0.308667	0.231667	0.552667	4.0105
7	GB_PIN7	10.6877	3.77767	0.390667	3.02533	2.9128	3.0354	0.953667	9.83967	2.62598	1.521
8	GB_PIN8	11.9037	3.23767	0.273	3.90167	4.5656	4.1206	1.136	1.62667	3.31807	0.6035
9	GB_PIN9	0.0966667	4.81033	6.066	0	0	0.0242	0.017	0	0	1.098
10	GB_PIN10	0.033	6.37233	6.606	0.02	0.0394	0.0998	0.123	0.0126667	0.0262667	4.191
11	GB_PIN11	15.7917	54.2683	28.4033	2.27867	2.5162	2.9602	5.09633	10.5863	2.23802	1.258
12	GB_PIN12	10.2877	50.1707	34.5173	2.999	4.5758	4.2698	2.918	7.95433	3.9742	2.6255
13	GB_PIN13	0.489333	0.975667	0.558667	0.725333	1.1078	2.6314	0.385667	0	0.776867	1.598
14	GB_PIN14	0.134	0.210667	0.751667	0	0.014	0.0336	0.015	0.0243333	0.018	0.0335
15	GB_PIN15	3.275	0	0	0.0423333	0	0.014	0	0	0	1.448
16	GB_PIN16	3.384	0.0246667	0	0	0.0034	0	0.0246667	0	0.00226667	1.3125
17	GB_PIN17	1.602	6.674	3.949	0.489333	0.5034	0.4486	0.295333	0.118333	0.386267	0.7475
18	GB_PIN18	1.58967	8.03133	4.152	0.301	0.2724	0.3816	0.801	0.085	0.477933	2.718
19	GB_PIN19	0	0.149333	0	0	0	0.0204	0	0.103	0	0
20	GB_PIN20	3.59633	3.476	0.792	6.51433	5.3438	5.3434	2.907	0.283667	3.58264	2.2365
21	GB_PIN21	3.08133	2.33467	0.681	1.01033	1.3038	0.8158	0.102667	0.011	0.8692	1.6195
22	GB_PIN22	0.558667	4.891	4.665	0.0143333	0.0142	0.0948	0.096	0	0.00946667	0.0245
23	GB_PIN23	1.531	2.47967	4.84467	0	0.0142	0.0646	0.072	0	0.00946667	0.047
24	GB_PILS1	6.942	2.21667	0.919667	0.197667	0.272	0.2562	0.110667	0.043	0.181333	0.857
25	GB_PILS2	2.437	3.37233	0.731	0	0	1.1264	5.22633	40.6927	0.169111	0.079
26	GB_PILS3	5.76933	11.1223	0.0263333	0.281	0.2174	0.009	1.143	0.547667	0.275267	1.811
27	GB_PILS4	0.985	0.309	3.78167	0.223	0.4348	1.4434	0.101	0.0283333	0.4022	0.3215
28	GB_PILS5	0.748667	4.57633	0	0.109333	0.0258	0.023	0	0.0216667	0.0416444	1.342
29	GB_PILS6	1.02367	0.286	4.06267	0.299	0.392	0.5316	0.343333	0.134667	0.337667	0.021
30	GB_PILS7	0	0.035	1.90333	0	0	0	0	0	0	0
31	GB_PILS8	0	0.0303333	0.976333	0	0	0	0	0	0	0
32	GB_PILS9	1.96533	1.58533	2.95733	0.248	0.1076	0.0162	0.0953333	0	0.0717333	0
33	GB_PILS10	1.23267	0.336667	0.0613333	0.995667	0.5902	0.6042	0.582333	0	0.4108	0
34	GB_PILS11	0.217333	0.431	1.05533	0.0563333	0.0566	0.0502	0.029	0.0156667	0.0424	2.287
35	GB_PILS12	1.66833	0.733	0.871667	2.186	1.1132	2.1772	2.262	0.811333	1.93058	0.3755
36	GB_PILS13	2.527	14.439	8.238	4.243	8.1448	9.5426	16.6397	43.56	7.23009	3.627
37	GB_PILS14	0.674	0.0993333	0.212333	0.224	0.0394	0.1774	0.384667	0.0153333	0.0623778	0.392
38	GB_PILS15	0.0573333	0.625	1.18067	0.0793333	0.0364	0.473	0.0296667	0	0.0333778	21.058
39	GB_PILS16	1.09833	3.16167	7.638	0.066	0.011	0.251	0.338333	0.0296667	0.111444	14.01
40	GB_PILS17	7.99833	7.847	7.44133	0.897	0.7664	3.478	8.99	15.0647	4.42549	3.34
41	GB_PILS18	8.338	9.01433	6.24467	0.307	0.9722	3.4116	5.39833	19.9347	20.6074	2.3635
42	GB_PILS19	6.39033	7.498	3.31467	12.1823	16.2972	17.2104	14.624	6.23033	16.8122	6.8325
43	GB_PILS20	7.50433	10.426	7.30533	7.53733	9.4214	12.093	14.989	14.7013	12.8045	7.2025
44	GB_PILS21	1.908	4.953	3.348	7.09933	3.6052	5.8462	8.50733	4.411	13.9135	3.7895
45	GB_PILS22	1.00367	7.42733	3.845	0.676667	0.6958	2.636	3.892	4.34333	1.81331	2.2245
		TM-1_Root	TM-1_Stem	TM-1_Leaf	TM-1_0DPA	TM-1_1DPA	TM-1_3DPA	TM-1_5DPA	TM-1_10DPA_Fiber	TM-1_20DPA_Fiber	TM-1_25DPA_Fiber
1	GH_PIN1	7.03347	10.763	1.6941	4.02097	6.0453	3.1002	2.0329	0.3684	3.1451	3.174
2	GH_PIN2	9.34377	10.9739	1.36563	12.3172	11.6932	6.2817	4.33373	0.9209	6.5945	5.7784
3	GH_PIN3	8.76963	5.3219	1.10967	0.313567	0.104067	0.48255	0.423733	0.0602	1.6912	0.6783
4	GH_PIN4	6.04327	3.64	0.7472	1.7623	0.4775	1.48695	2.26887	2.2989	1.3996	1.2029
5	GH_PIN5	14.3771	19.6225	2.37553	1.43803	0.480267	1.34075	1.1476	0.3075	18.292	3.0978
6	GH_PIN6	15.8194	17.286	1.95783	0.3796	0.208633	0.5154	0.553167	0.369	11.0768	2.6902
7	GH_PIN7	14.3769	2.26195	0.725067	5.07213	1.71887	5.014	9.7967	22.0316	7.2393	2.9878
8	GH_PIN8	10.4689	2.33695	0.2153	5.08827	2.46507	1.9614	3.72987	1.9682	2.9377	1.1783
9	GH_PIN9	0	2.80615	3.13577	0	0	0	0	0	0	1.1457
10	GH_PIN10	0	4.57285	3.2356	0	0	0.0256	0.263433	0	0	0.563
11	GH_PIN11	18.71	63.797	23.6976	1.96187	2.97547	5.53845	10.6057	12.9843	8.1783	3.5118
12	GH_PIN12	11.6662	58.2555	32.5804	2.0298	1.5619	7.4802	16.9305	10.8854	11.4207	4.3135
13	GH_PIN13	1.4862	2.06365	0.403433	4.37703	6.89453	3.9824	2.07157	0.954	3.1529	2.5292
14	GH_PIN14	0.341933	0.9117	0.271233	0	0	0.05875	0.160333	0	0	0.2582
15	GH_PIN15	5.9408	0	0	0.0144333	0.0553333	0	0	0.059	0.8769	0.8988
16	GH_PIN16	5.88187	0	0	0.0485	0.0126333	0	0	0	0.0979	1.0995
17	GH_PIN17	1.16083	7.88715	2.0189	0.243367	0.714367	0.33925	0.2989	0.2073	0.5138	0.0687
18	GH_PIN18	1.9188	8.34175	3.04933	0.171633	0.0966333	0.8186	0.669733	0.2953	3.0903	1.37
19	GH_PIN19	0.214767	0.48445	0	0.0610667	0	0	0.0256667	0	0	0.1058
20	GH_PIN20	3.48067	2.59995	1.4931	9.8625	4.5752	3.7647	16.904	0.4074	1.5707	0.945
21	GH_PIN21	2.98843	1.23625	1.69257	1.50383	0.291133	0.11555	0.2867	0	0	0.18
22	GH_PIN22	0.0850333	7.506	1.45163	0.02	0.0490333	0	0.0336	0	0	0
23	GH_PIN23	1.43223	4.48585	2.55557	0.0255667	0.3791	0	0.0871	0	0	0
24	GH_PILS1	8.9507	1.087	0.684267	0.0728333	0.0588333	0.10355	0.116733	0	0	0.295
25	GH_PILS2	1.69153	2.70715	0.263433	0.0435667	0.0588333	1.48785	2.29357	19.8492	0.8825	0.236
26	GH_PILS3	12.7842	7.1687	0	0	0.204767	0.1372	0.446633	0.6463	45.005	10.4024
27	GH_PILS4	12.0175	11.8909	0	0	0.0197	0	0.0332333	0	11.442	2.57
28	GH_PILS5	0.390067	0.1098	2.3021	1.21297	3.70227	9.61965	5.30667	1.348	0.297	1.1913
29	GH_PILS6	1.73943	0.3294	5.41613	0.6754	0.3201	1.0608	3.04263	0.719	0.891	0.2978
30	GH_PILS7	0.179567	0.17485	0.5584	0.162433	0	0.1385	0.194433	1.2632	0	1.9028
31	GH_PILS8	0	0.04445	0.110767	0.0428333	0.0410667	0.181	0.716967	1.1381	0.1447	0.116
32	GH_PILS9	0.0237	0	2.13493	0	0	0	0	0	0	0.0616
33	GH_PILS10	0	0	1.1671	0	0.0992	0	0	0	0	0.0616
34	GH_PILS11	1.9226	1.13695	2.1268	0.0910333	0.0198333	0	0	0	0	0
35	GH_PILS12	0.793533	0.54955	0.508667	0.803567	1.23967	0.27275	0.563533	0.0959	0	0.1271
36	GH_PILS13	0.6853	0.06515	0.270133	0.494967	0.262867	0.02555	0.169267	0	0.1507	0.967
37	GH_PILS14	1.0295	0.68195	0.963433	3.8791	1.2161	0.436	0.275767	0.2736	0.3014	9.8518
38	GH_PILS15	0.8773	19.1625	8.75977	9.68133	30.2276	5.04545	1.48007	8.9259	2.0445	7.9661
39	GH_PILS16	1.08157	0.98075	0.939667	2.03713	3.99693	1.3692	0.200133	0.3612	0.5969	17.4773
40	GH_PILS17	1.2392	1.06535	1.61993	0	0.0561333	0.21165	0	0.0878	0	0.8724
41	GH_PILS18	15.7647	16.314	7.11163	2.00583	4.3695	7.8751	7.88283	13.7599	18.3996	7.3199
42	GH_PILS19	7.9721	9.37925	5.6254	2.48037	2.2502	4.82275	6.4025	13.5788	38.7438	14.4599
43	GH_PILS20	10.6348	10.3121	2.82307	21.0647	26.0852	11.9551	10.47	5.5151	13.058	10.2567
44	GH_PILS21	9.70483	9.27985	3.22293	7.6217	12.8529	15.8467	14.4288	11.2771	11.5618	11.1842
45	GH_PILS22	1.89023	16.7905	5.4396	2.26573	5.01773	6.93965	8.33413	3.4106	31.3812	4.5723
46	GH_PILS23	1.38037	7.16565	2.90637	3.34977	6.27793	4.7701	4.43813	3.3824	36.3981	9.8967
