# Supplementary material for: Identification and functional analysis of PIN family genes in Gossypium barbadense
Source: PeerJ. 2022 Oct 18;10:e14236. doi: 10.7717/peerj.14236 (PMC9586078; doi:10.7717/peerj.14236)
Supplement: Supplemental Information 5 [file peerj-10-14236-s005.xlsx]

## Sheet: Sheet1
Fiber 0-35 DPA Endogenous auxin(μmol/g)
	PimaS-7			5917
	Repeat 1	Repeat 2	Repeat 3	Repeat 1	Repeat 2	Repeat 3
0DPA	0.312106	0.304146	0.289021	0.327232	0.327232	0.296185
5DPA	0.294593	0.295389	0.339969	0.31131	0.304146	0.324843
10DPA	0.324047	0.288225	0.253198	0.399673	0.372607	0.351114
15DPA	0.256382	0.249218	0.266731	0.344745	0.339173	0.343153
20DPA	0.252402	0.252402	0.244441	0.3336	0.35191	0.324047
25DPA	0.284343	0.353502	0.296981	0.343153	0.319271	0.377384
30DPA	0.327232	0.310514	0.326436	0.401265	0.374199	0.379772
35DPA	0.313699	0.320863	0.319271	0.374199	0.359074	0.33758
After VIGS Leves and stem Endogenous auxin(μmol/g)
	TRV::00			TRV::GbPIN7
	Repeat 1	Repeat 2	Repeat 3	Repeat 1	Repeat 2	Repeat 3
PimaS-7_Leaf	0.321017	0.313136	0.309554	0.303106	0.306688	0.309554
PimaS-7_Stem	0.364721	0.343227	0.326749	0.313853	0.341078	0.315286
5917_Leaf	0.33463	0.349676	0.351108	0.297374	0.309554	0.316002
5917_Stem	0.402693	0.383319	0.39899	0.384782	0.380483	0.364721
Changes of average height of cotton after VIGS(cm)
	TRV::00			TRV::GbPIN7
	Repeat 1	Repeat 2	Repeat 3	Repeat 1	Repeat 2	Repeat 3
PimaS-7	16.6667	17.5667	16.3	22.3	20.3	21.4
5917	28.9	30.0667	28.7	38.4	36.8	37.22
